# Supplementary material for: Nitrosative and Oxidative Stress, Reduced Antioxidant Capacity, and Fiber Type Switch in Iron-Deficient COPD Patients: Analysis of Muscle and Systemic Compartments
Source: MDPI journal article supplement (doi:10.3390/nu15061454), 2023-03-17
Supplement: s1 [file s1]

Figure S1. Standard curve - Elabscience® 3-NT(3-Nitrotyrosine) ELISA kit

| Standard curve |      |
|----------------|------|
| ng/mL          | OD   |
| 100.00         | 0.12 |
| 50.00          | 0.16 |
| 25.00          | 0.23 |
| 12.50          | 0.31 |
| 6.25           | 0.46 |
| 3.13           | 0.61 |
| 1.56           | 0.71 |
| 0.00           | 0.83 |

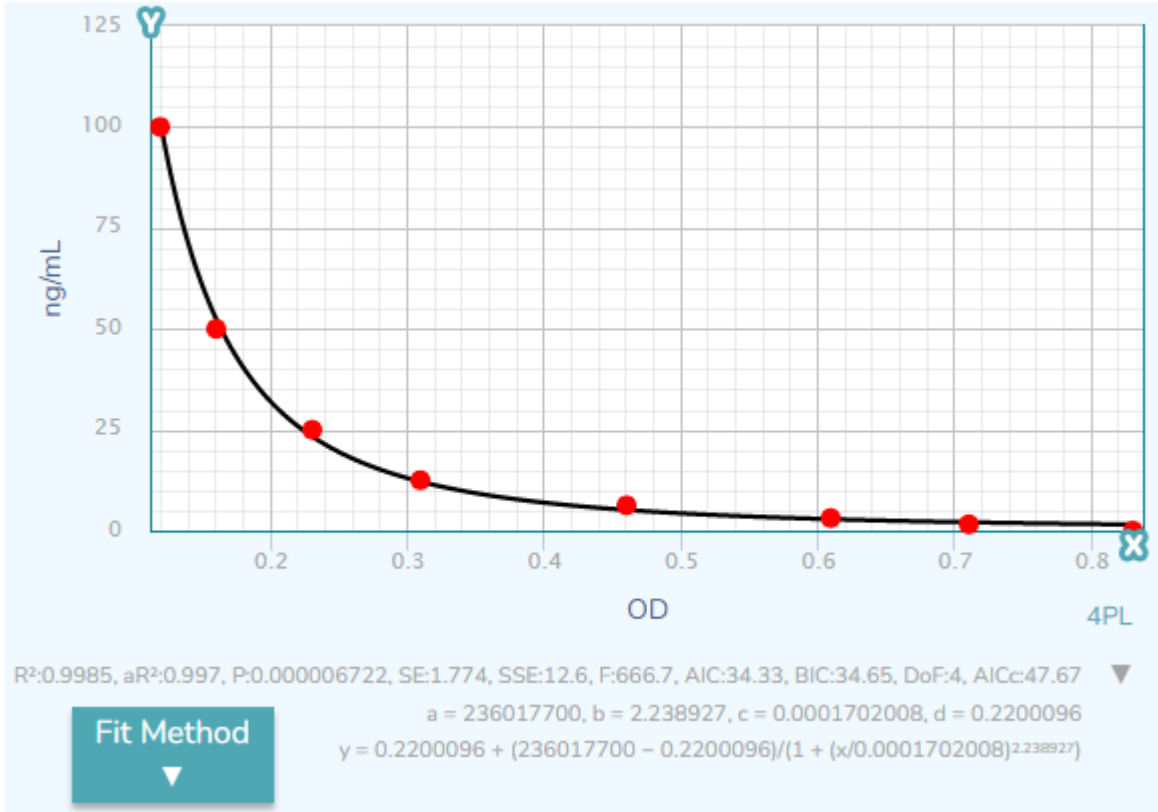

Figure S2. Standard curve - Protein Carbonyl Content Assay Kit

| Standard curve |      |
|----------------|------|
| ng/mL          | OD   |
| 2000           | 0.93 |
| 1500           | 0.73 |
| 1000           | 0.53 |
| 750            | 0.41 |
| 500            | 0.30 |
| 250            | 0.17 |
| 125            | 0.09 |
| 25             | 0.01 |
| 0              | 0.00 |

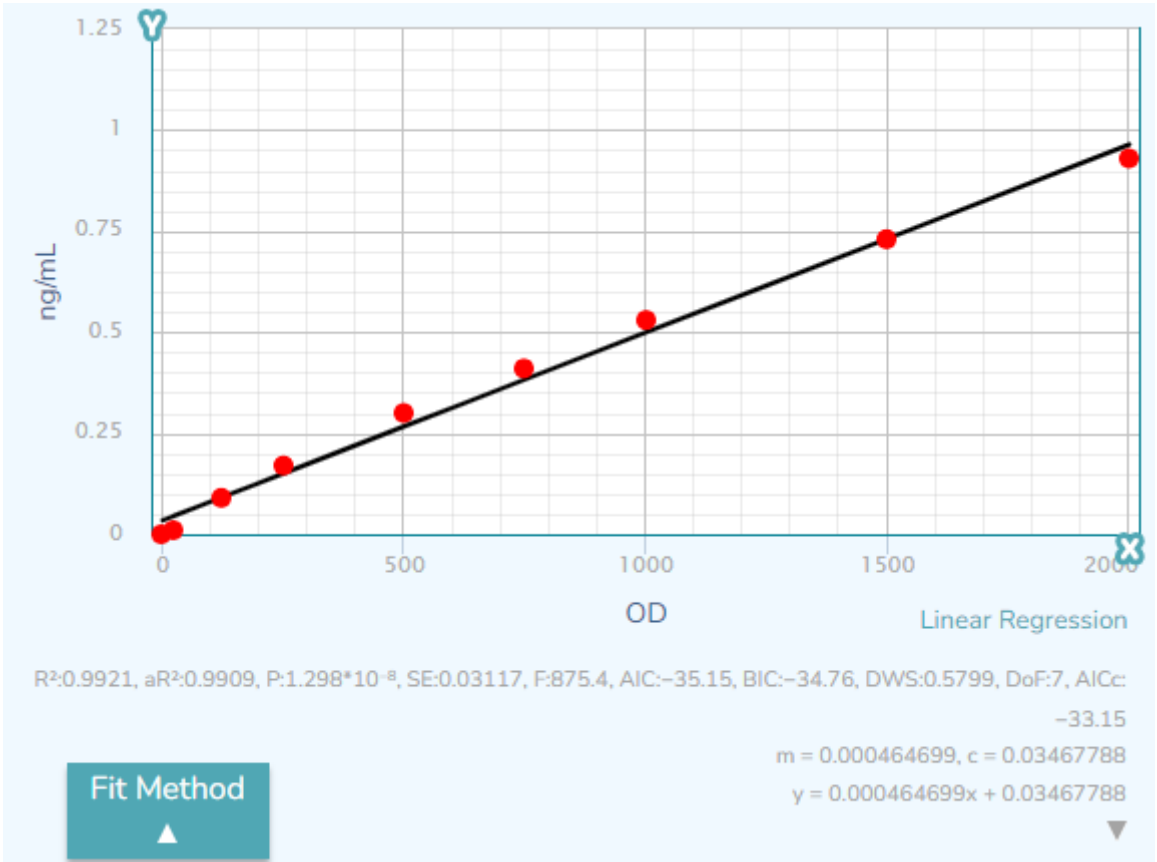

Figure S3. Standard curve - OxiSelect™ MDA Adduct Competitive ELISA Kit

| Standard curve |      |
|----------------|------|
| ng/mL          | OD   |
| 1500           | 0.05 |
| 188            | 0.09 |
| 94             | 0.12 |
| 47             | 0.16 |
| 24             | 0.19 |
| 12             | 0.20 |
| 6              | 0.22 |
| 0              | 0.25 |

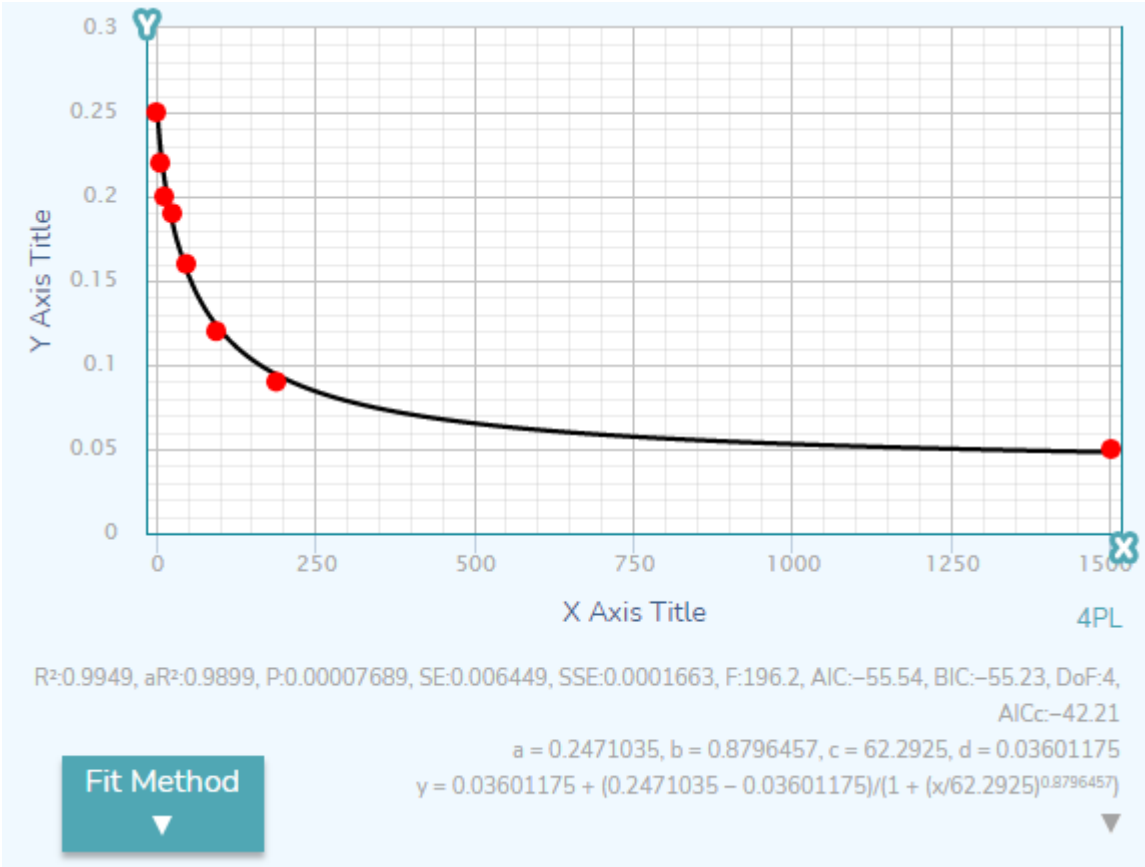

Figure S4. Standard curve - Superoxide Dismutase Assay Kit

| Standard curve |      |
|----------------|------|
| U/mL           | OD   |
| 0              | 0.35 |
| 0.005          | 0.31 |
| 0.01           | 0.28 |
| 0.015          | 0.24 |
| 0.02           | 0.20 |
| 0.025          | 0.18 |
| 0.03           | 0.16 |
| 0.04           | 0.10 |

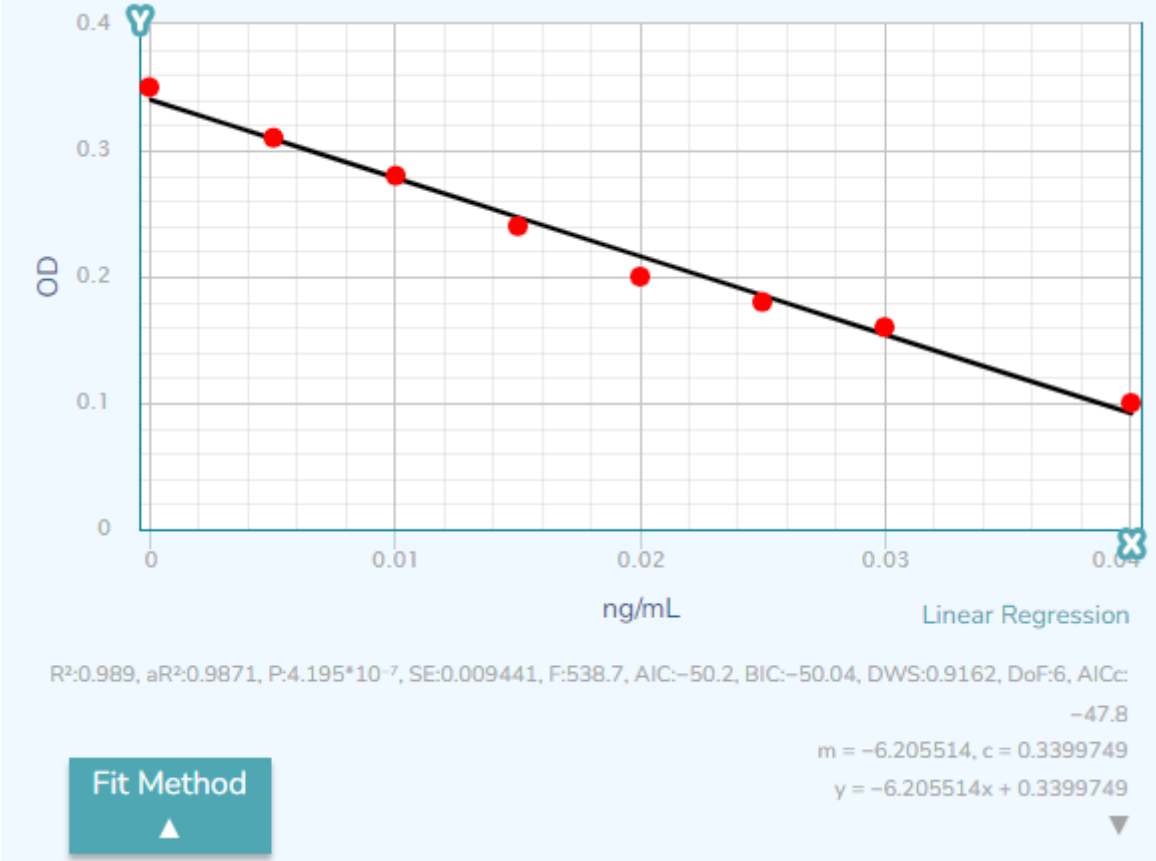

Figure S5. Standard curve - Catalase Assay kit

| Standard curve |      |
|----------------|------|
| U/mL           | OD   |
| 0.00           | 0.00 |
| 5.00           | 0.07 |
| 10.00          | 0.09 |
| 15.00          | 0.15 |
| 20.00          | 0.19 |
| 30.00          | 0.28 |
| 45.00          | 0.40 |
| 60.00          | 0.49 |
| 75.00          | 0.68 |
| 100.00         | 0.86 |

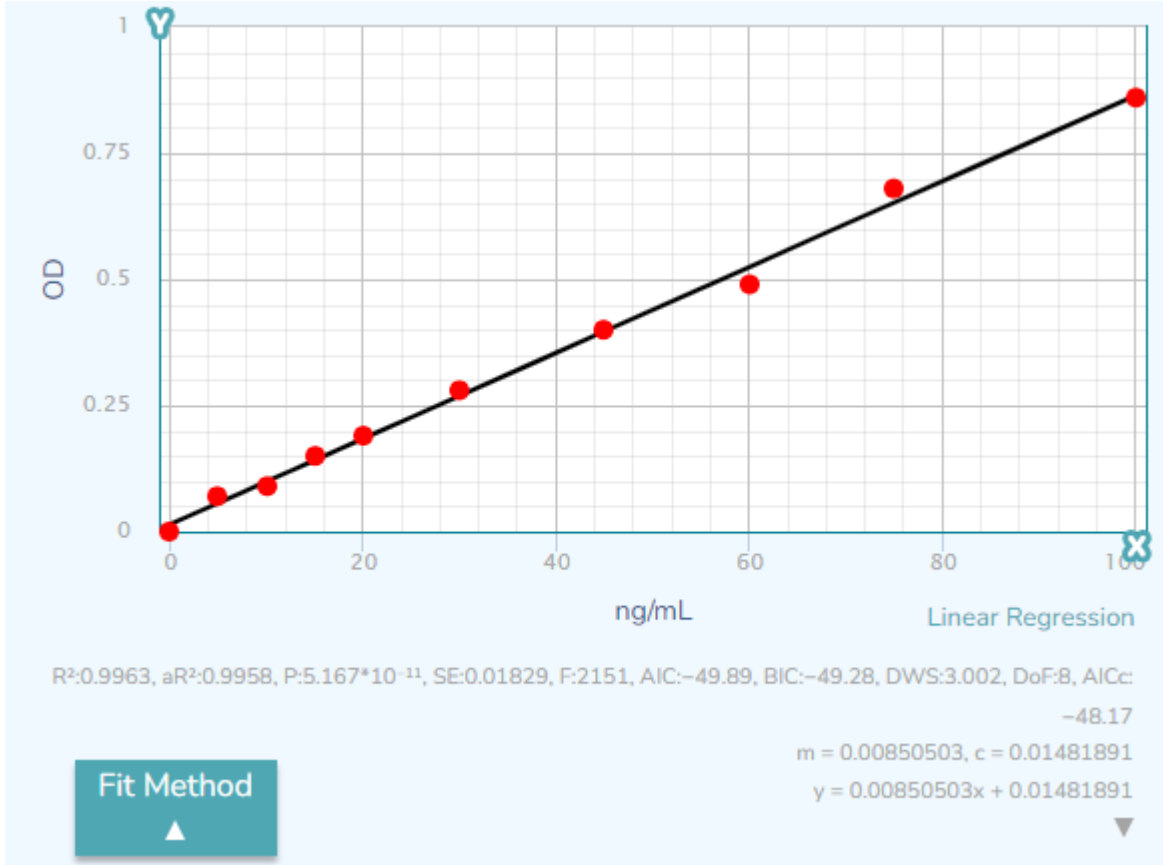

Figure S6. Standard curve - The OxiSelect™ TEAC (TEAC Assay Kit (ABTS))

| Standard curve |       |
|----------------|-------|
| (TE)<br>μmol/g | OD    |
| 150.00         | 0.528 |
| 75.00          | 0.826 |
| 37.50          | 0.965 |
| 18.80          | 1.084 |
| 9.40           | 1.138 |
| 4.70           | 1.158 |
| 0.00           | 1.171 |

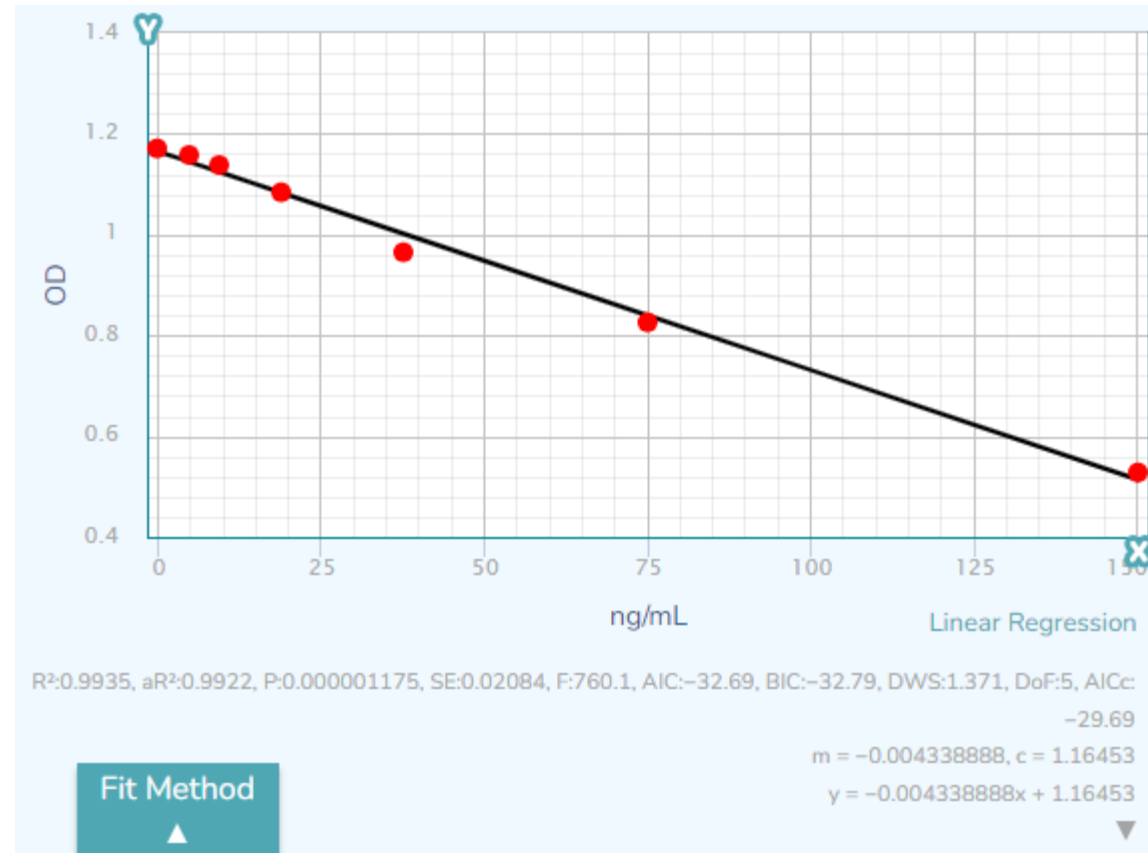

Figure S7. Standard curve - The human Reduced Glutathione (GSH) ELISA Kit

| Standard curve |      |
|----------------|------|
| ng/mL          | OD   |
| 0              | 0.93 |
| 1.56           | 0.67 |
| 3.125          | 0.38 |
| 6.25           | 0.22 |
| 12.5           | 0.15 |
| 25             | 0.10 |
| 37.5           | 0.09 |
| 50             | 0.06 |

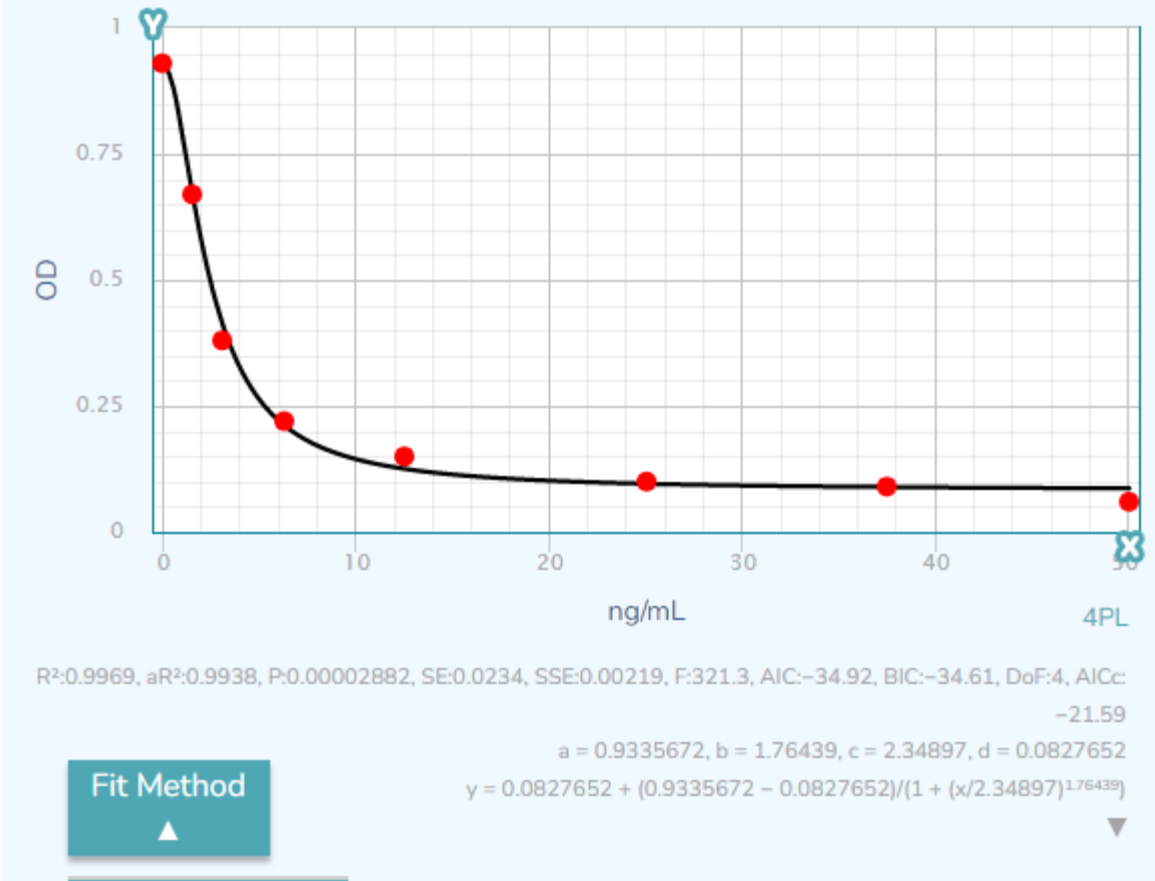

Figure S8. Standard curve - the Human hepcidin (Hepc) ELISA kit

| Standard curve |         |
|----------------|---------|
| ng/mL          | OD      |
| 0              | 0       |
| 12.5           | 0.07075 |
| 25             | 0.1149  |
| 37.5           | 0.16755 |
| 50             | 0.22685 |
| 87.5           | 0.3685  |
| 100            | 0.5512  |
| 200            | 0.7719  |
| 300            | 1.3383  |
| 400            | 1.3994  |

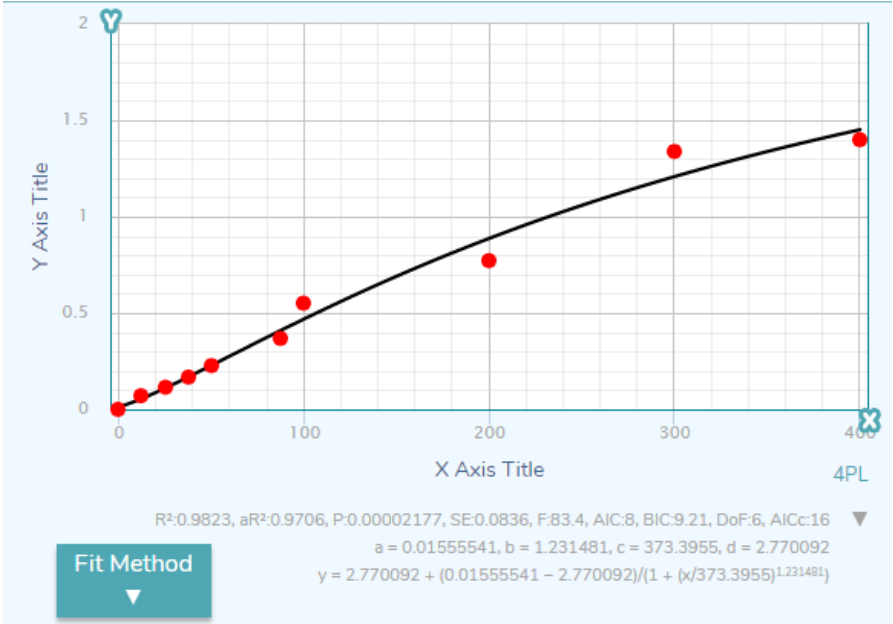



Figure S9. Intra-assay CV

| Intra-assay coefficients of variation |      |      |          |      |      |                       |                     |          |
|---------------------------------------|------|------|----------|------|------|-----------------------|---------------------|----------|
| Sample ID                             | TEAC | GSH  | Catalase | SOD  | 3-NT | Protein carbonylation | MDA protein adducts | Hepcidin |
| 1                                     | 1.83 | 3.02 | 4.00     | 0.48 | 0.86 | 0.80                  | 2.16                | 5.18     |
| 2                                     | 1.44 | 0.61 | 4.74     | 3.47 | 9.81 | 1.07                  | 3.91                | 9.18     |
| 3                                     | 1.02 | 2.23 | 3.85     | 4.85 | 1.19 | 2.95                  | 0.68                | 1.63     |
| 4                                     | 0.86 | 3.98 | 2.68     | 1.53 | 3.76 | 3.59                  | 1.30                | 6.58     |
| 5                                     | 2.57 | 2.18 | 3.92     | 4.26 | 4.56 | 1.73                  | 2.54                | 4.75     |
| 6                                     | 3.08 | 7.78 | 1.74     | 4.58 | 1.82 | 4.02                  | 1.67                | 4.34     |
| 7                                     | 1.89 | 3.32 | 3.91     | 3.04 | 7.70 | 0.81                  | 2.42                | 2.31     |
| 8                                     | 0.82 | 2.01 | 3.86     | 0.22 | 5.53 | 5.57                  | 0.40                | 1.20     |
| 9                                     | 0.08 | 1.38 | 1.71     | 1.33 | 6.78 | 2.90                  | 1.07                | 6.41     |
| 10                                    | 1.85 | 3.28 | 0.47     | 0.38 | 4.03 | 0.68                  | 3.55                | 1.59     |
| 11                                    | 0.88 | 1.61 | 7.97     | 2.29 | 6.99 | 5.80                  | 4.41                | 2.41     |
| 12                                    | 3.13 | 3.99 | 3.29     | 1.96 | 1.51 | 0.25                  | 5.29                | 0.11     |
| 13                                    | 4.35 | 0.06 | 5.78     | 0.71 | 1.27 | 4.74                  | 2.04                | 4.38     |
| 14                                    | 1.92 | 0.18 | 8.52     | 4.64 | 4.65 | 2.31                  | 2.13                | 2.62     |
| 15                                    | 2.11 | 0.00 | 2.14     | 0.99 | 0.86 | 2.03                  | 4.88                | 5.04     |
| 16                                    | 0.65 | 1.94 | 2.86     | 2.18 | 4.65 | 4.94                  | 0.24                | 3.83     |
| 17                                    | 1.14 | 1.55 | 0.96     | 4.22 | 2.06 | 3.92                  | 1.89                | 1.99     |
| 18                                    | 2.24 | 0.09 | 8.83     | 8.92 | 4.51 | 0.79                  | 7.18                | 4.96     |
| 19                                    | 1.44 | 1.45 | 5.35     | 6.37 | 2.60 | 3.92                  | 4.33                | 3.33     |
| 20                                    | 2.99 | 1.05 | 7.17     | 0.17 | 2.21 | 0.98                  | 1.61                | 3.34     |
| 21                                    | 1.85 | 1.44 | 4.97     | 0.12 | 0.27 | 1.18                  | 6.64                | 6.60     |
| 22                                    | 2.89 | 0.07 | 2.83     | 3.58 | 2.92 | 0.43                  | 1.68                | 0.84     |
| 23                                    | 3.10 | 0.76 | 4.05     | 3.31 | 1.85 | 1.64                  | 0.13                | 5.20     |
| 24                                    | 0.73 | 0.51 | 3.63     | 2.84 | 7.03 | 1.40                  | 2.33                | 4.03     |
| 25                                    | 3.64 | 1.93 | 8.49     | 6.03 | 0.61 | 0.24                  | 1.30                | 5.57     |
| 26                                    | 0.07 | 1.90 | 3.54     | 2.37 | 4.76 | 1.71                  | 3.34                | 4.64     |
| 27                                    | 3.13 | 0.89 | 8.63     | 8.45 | 3.03 | 3.10                  | 0.66                | 3.08     |
| 28                                    | 2.80 | 4.63 | 7.06     | 3.90 | 1.89 | 0.00                  | 2.33                | 10.98    |
| 29                                    | 0.83 | 1.06 | 9.25     | 1.25 | 1.94 | 1.82                  | 0.70                | 3.20     |
| 30                                    | 0.78 | 0.50 | 3.57     | 0.94 | 6.82 | 1.09                  | 1.30                | 4.53     |
| 31                                    | 0.75 | 1.84 | 4.64     | 0.49 | 3.93 | 6.31                  | 2.70                | 4.88     |
| 32                                    | 3.75 | 3.64 | 6.19     | 4.54 | 2.31 | 0.83                  | 3.01                | 4.35     |
| 33                                    | 4.22 | 3.81 | 7.03     | 4.93 | 0.87 | 0.00                  | 9.74                | 2.72     |
| 34                                    | 1.31 | 1.53 | 1.65     | 2.07 | 7.16 | 3.42                  | 3.81                | 1.24     |
| 35                                    | 2.55 | 2.79 | 0.42     | 3.32 | 5.23 | 0.85                  | 1.00                | 6.28     |
| 36                                    | 2.04 | 4.02 | 3.45     | 5.31 | 2.75 | 1.41                  | 8.36                | 0.15     |
| 37                                    | 5.28 | 1.57 | 7.06     | 5.40 | 0.51 | 0.90                  | 4.99                | 9.40     |
| 38                                    | 2.24 | 1.62 | 5.19     | 8.43 | 0.56 | 0.76                  | 1.28                | 9.49     |
| 39                                    | 3.05 | 1.57 | 4.31     | 3.46 | 1.67 | 6.43                  | 2.10                | 6.52     |
| 40                                    | 1.69 | 4.08 | 2.54     | 1.50 | 3.62 | 1.24                  | 7.25                | 8.86     |
